# Supplementary material for: De novo design of potential peptide analogs against the main protease of Omicron variant using in silico studies
Source: Royal Society of Chemistry journal article supplement (doi:10.1039/d4cp01199f), 2024-01-01
Supplement: d4cp01199f1.pdf [file d4cp01199f1.pdf]

## Supporting Information

### ***De Novo* Design of Potential Peptide Analogs against Main Protease of Omicron Variant using *in silico* Studies**

Stanly Paul M.L.<sup>c</sup>, Sonia Kumari<sup>d</sup>, Tamás A. Martinek<sup>\*ab</sup> and Elizabeth Sobhia M <sup>\*d</sup>

<sup>a</sup>Department of Medical Chemistry, University of Szeged, Dóm tér 8, H-6720 Szeged, Hungary

<sup>b</sup>ELKH-SZTE Biomimetic Systems Research Group, University of Szeged, Dóm tér 8, H-6720 Szeged, Hungary.  
Email: martinek.tamas@med.u-szeged.hu

<sup>c</sup>Institute of Pharmaceutical Analysis, University of Szeged, Eotvos u. 6, G-6720 Szeged, Hungary. Email: stanley.szte@gmail.com

<sup>d</sup>Department of Pharmacoinformatics, National Institute of Pharmaceutical Education and Research (NIPER), Sector-67, S.A.S. Nagar, Mohali 160062, India. Email: mesophia@niper.ac.in

| <b>Table of Contents</b> | <b>Page number</b> |
|--------------------------|--------------------|
| Figure S1 .....          | 3                  |
| Figure S2 .....          | 4                  |
| Figure S3 .....          | 5                  |
| Figure S4 .....          | 6                  |
| Figure S5 .....          | 7                  |
| Figure S6 .....          | 7                  |
| Table S1 .....           | 8                  |
| Table S2 .....           | 10                 |
| Table S3 .....           | 10                 |
| Table S4 .....           | 11                 |
| Table S5 .....           | 12                 |

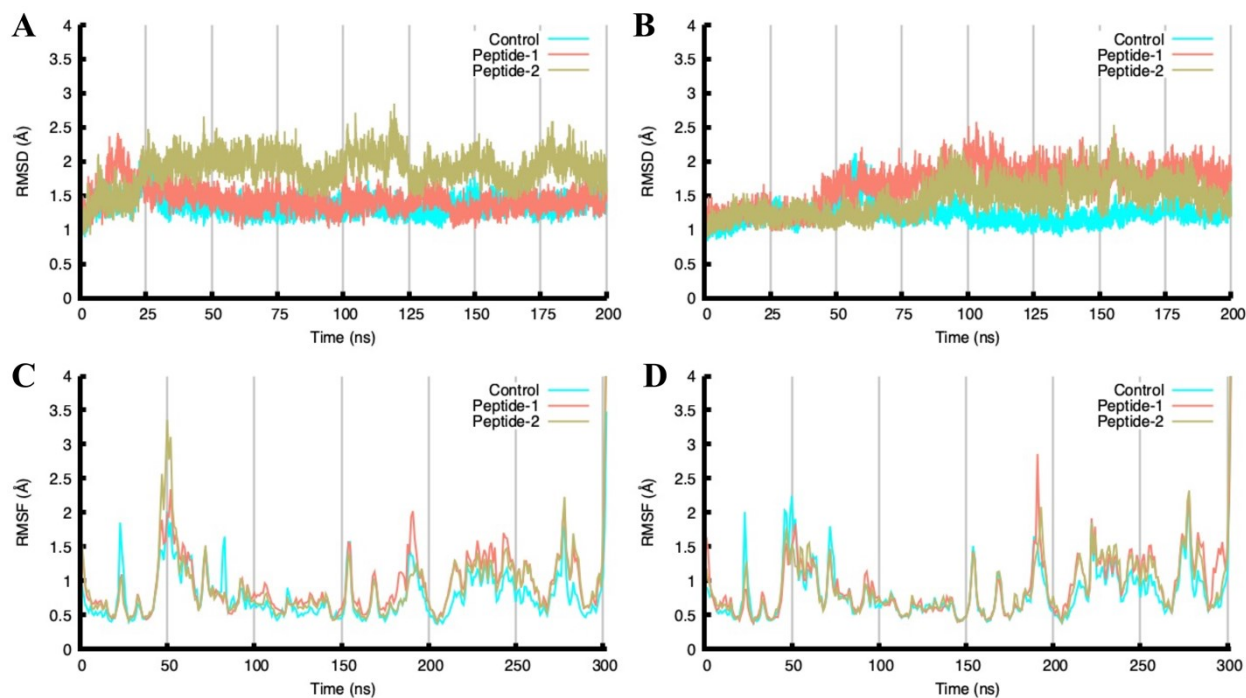

**Figure S1.** (A) RMSD of Mpro<sup>(SARS-CoV2)</sup> while binding with control peptide (cyan), peptide-(I)(salmon) and peptide-(II) (olive) in MD simulations (B) RMSD of Mpro<sup>(Omicron)</sup> while binding with control peptide (cyan), peptide-(I) (salmon) and peptide-(II) (olive) in MD simulations (C) RMSF of Mpro<sup>(SARS-CoV2)</sup> while binding with control peptide (cyan), peptide-(I) (salmon) and peptide-(II) (olive) in MD simulations (D) RMSF of Mpro<sup>(Omicron)</sup> while binding with control peptide (cyan), peptide-(I) (salmon) and peptide-(II) (olive) in MD simulations.

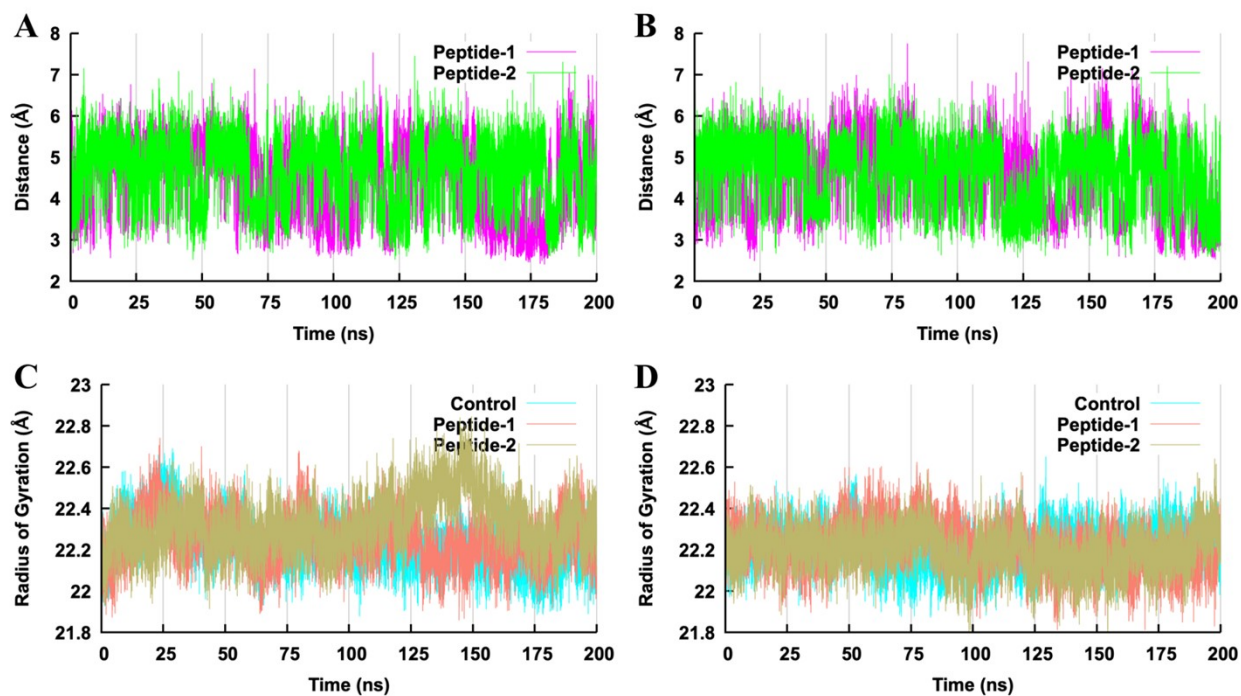

**Figure S2.** (A) Salt bridge distance between Mpro<sup>(SARS-CoV-2)</sup> Glu166 and Lys528 Peptide(I) (magenta), Peptide(II) (green) during 200ns MD simulations. (B) Salt bridge distance between Mpro<sup>(Omicron)</sup> Glu166 and Lys528 Peptide(I) (magenta), Peptide(II) (green) during 200ns MD simulations. (C) The radius of gyration of Mpro<sup>(SARS-CoV2)</sup> during the 200ns MD simulations while interacting with control peptide (cyan), Peptide(I) (salmon) and Peptide(II) (olive) (D) Radius of gyration of Mpro<sup>(Omicron)</sup> during the 200ns MD simulations while interacting with control peptide (cyan), Peptide(I) (salmon) and Peptide(II) (olive).

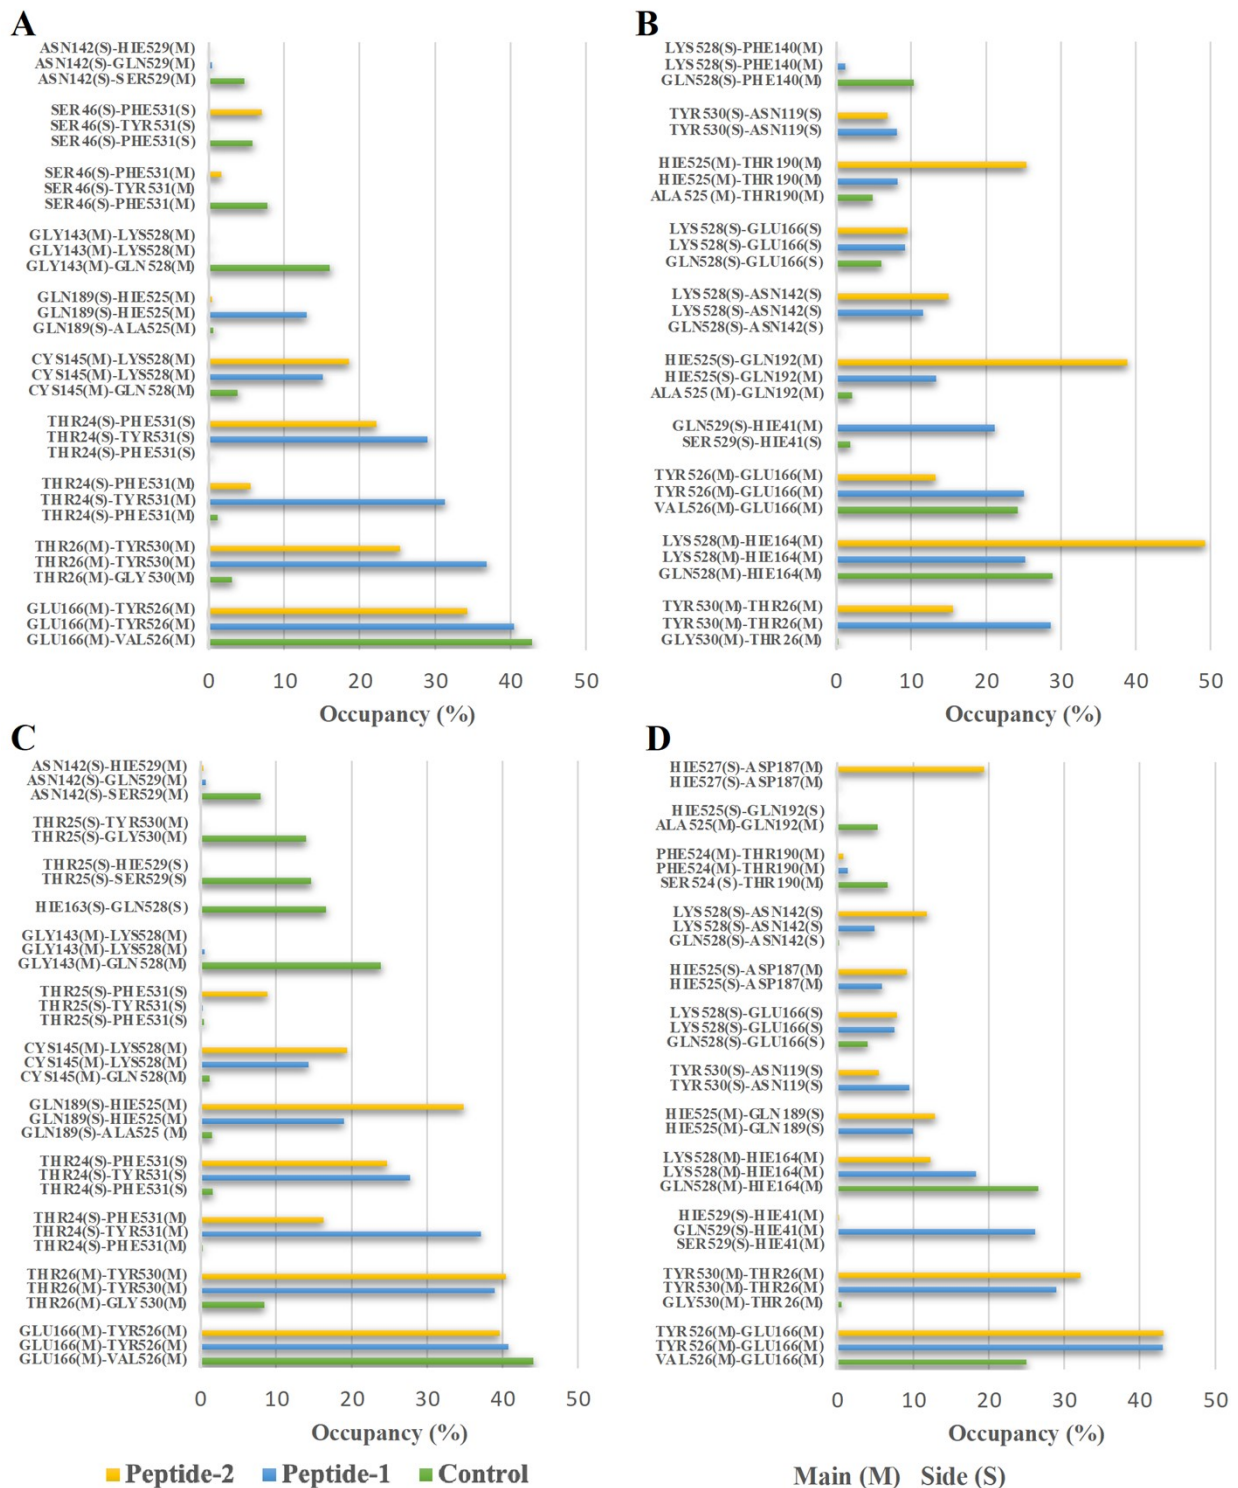

**Figure S3.** Histogram for hydrogen bond occupancy between pairs (peptide-protein) in SARS-CoV2(A,B) and Omicron (C, D); (A) Peptide/peptide mimics acting as hydrogen bond “Acceptor” and Mpro<sup>(SARS-CoV2)</sup> as hydrogen bond “Donor”; (B) Peptide/peptide mimics acting as hydrogen bond “Donor” and Mpro<sup>(SARS-CoV2)</sup> as hydrogen bond “Acceptor”; (C) Peptide/peptide mimics acting as hydrogen bond “Acceptor” and Mpro<sup>(Omicron)</sup> as hydrogen bond “Donor”; (D) Peptide/peptide mimics acting as hydrogen bond “Donor” and Mpro(Omicron) as hydrogen bond “Acceptor”.

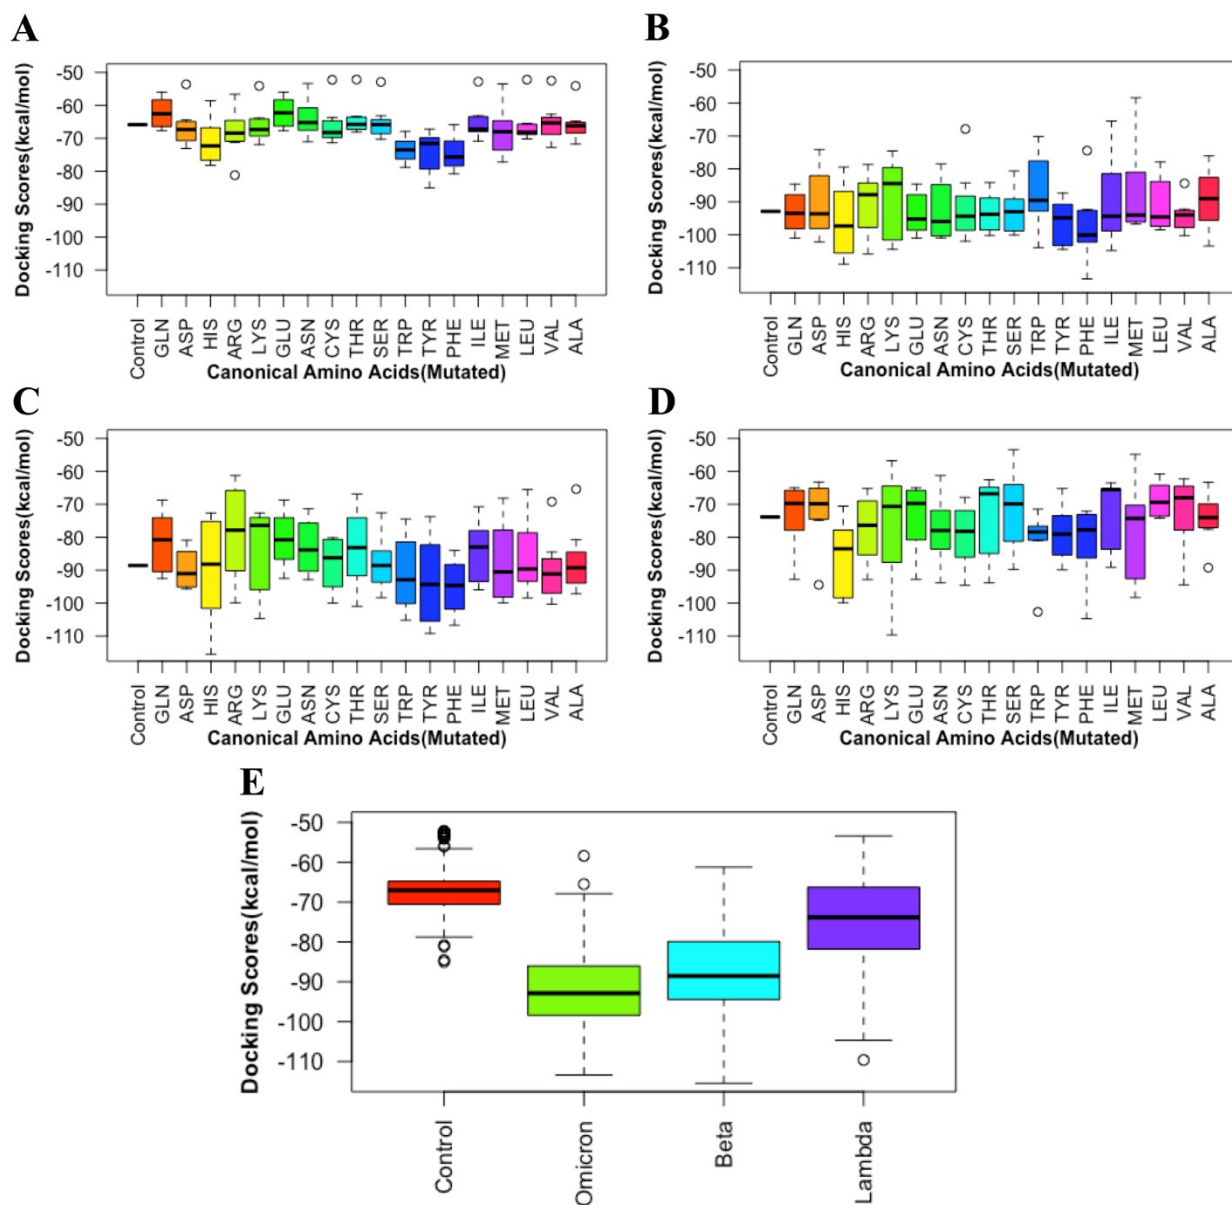

**Figure S4.** X-axis denotes the canonical amino acids (except proline and glycine) and Y-axis denotes docking scores. The standard deviation of the (A) Mpro<sup>(SARS-CoV-2)</sup>-peptide/peptide-analogs, (B) Mpro<sup>(Omicron)</sup>-peptide/peptide-analogs, (C) Mpro<sup>(Beta)</sup>-peptide/peptide-analogs, (D) Mpro<sup>(Lambda)</sup>-peptide/peptide-analogs docking scores were obtained by using 8 replicates (20 canonical amino acids (except Proline and glycine) were mutated on 8 amino acid peptides). (E) Comparison of docking scores across variants (significant difference observed (P-value < 0.005)).

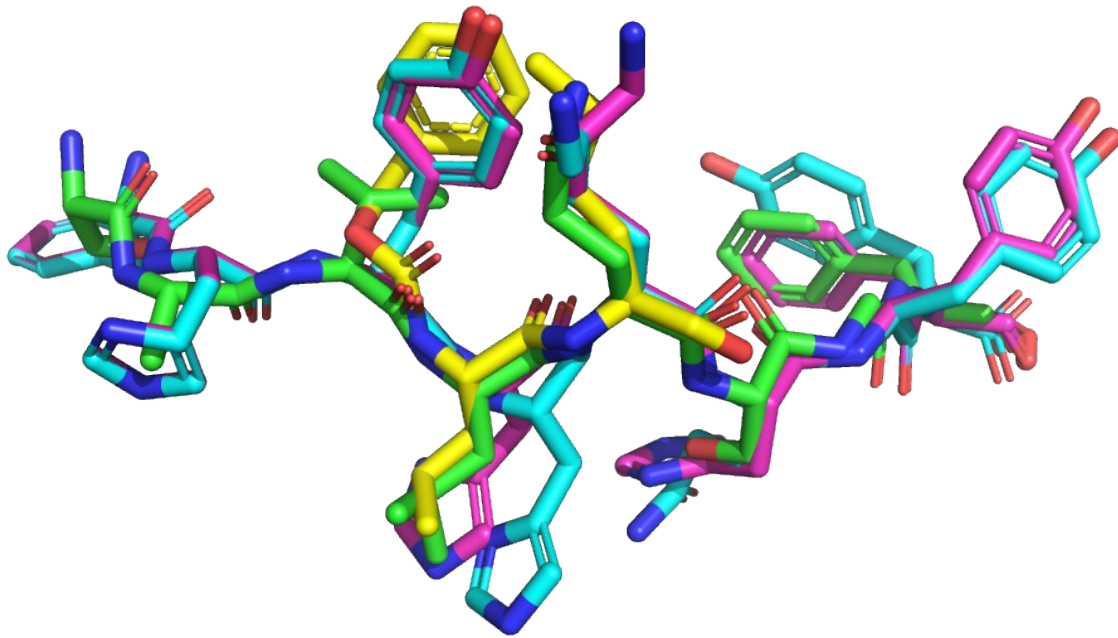

**Figure S5.** Superimposition of reference peptide(green), peptide-1(cyan) and peptide-2(pink with calpeptin(yellow))

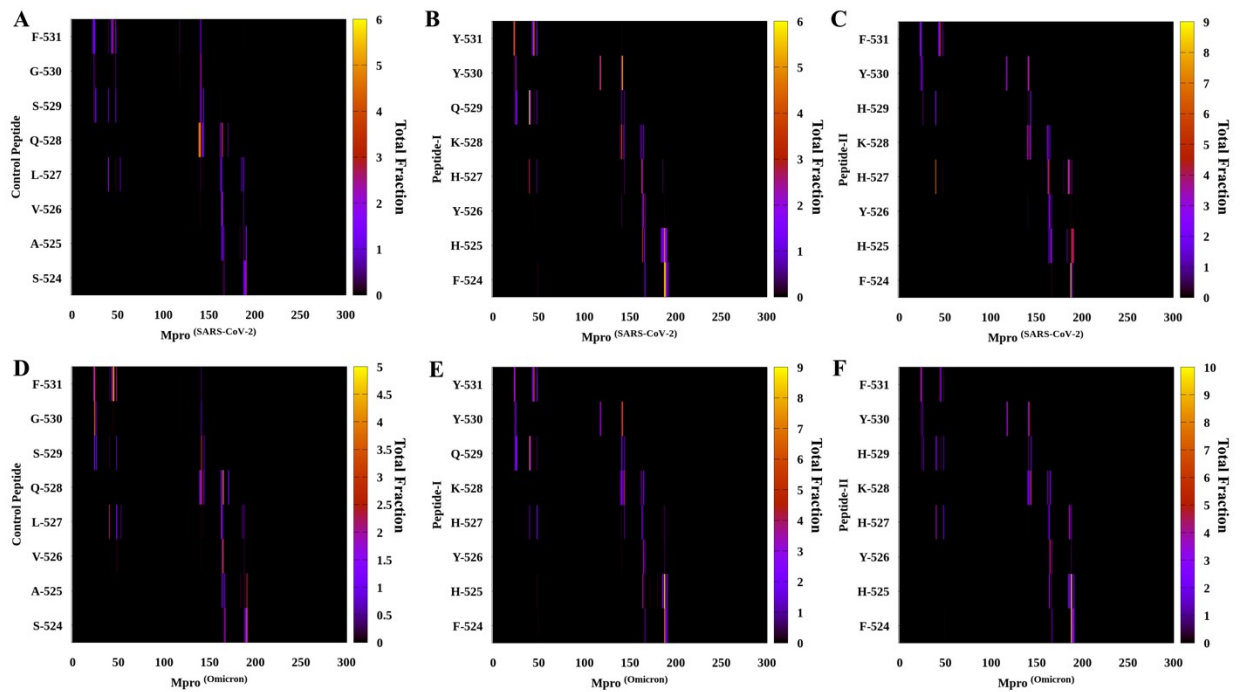

**Figure S6.** Contact information within 4Å in between (Mpro<sup>(SARS-CoV-2)</sup> with peptide substrate(A), Peptide-1(B) and Peptide-2(C). Native contacts between Mpro<sup>(Omicron)</sup> with peptide substrate(D), Peptide-1(E) and Peptide-2(F).



**Table S1.** Initial docked pose interactions of substrate peptide(control) with Mpro<sup>(SARS-CoV2, Omicron, Beta, Lambda)</sup> variants. “\*” denotes hydrogen bonds.

| Peptides          | Interactions  | Peptide residues | Control                                                               | Distance (Å)                                  | Omicron                                                                                              | Distance (Å)                                                | Beta                                                                                     | Distance (Å)                                         | Lambda                                                                      | Distance (Å)                                  |
|-------------------|---------------|------------------|-----------------------------------------------------------------------|-----------------------------------------------|------------------------------------------------------------------------------------------------------|-------------------------------------------------------------|------------------------------------------------------------------------------------------|------------------------------------------------------|-----------------------------------------------------------------------------|-----------------------------------------------|
| Reference Peptide | Hydrogen Bond | Peptide          | Mpro (Protein)                                                        |                                               |                                                                                                      |                                                             |                                                                                          |                                                      |                                                                             |                                               |
|                   |               | 524:Ser          | 189:Gln<br>168:Pro<br>190:Thr                                         | 3.2<br>3.3<br>3.4                             | 190:Thr<br>168:Pro<br>191:Ala                                                                        | 3.7<br>3.9<br>3.9                                           | 190:Thr<br>168:Pro<br>191:Ala                                                            | 3.4<br>3.5<br>3.7                                    | 168:Pro<br>190:Thr                                                          | 3.5<br>3.6                                    |
|                   |               | 525:Ala          | 190:Thr*<br><br>189:Gln<br>188:Arg                                    | 2.9<br>3.1<br>3.0                             | 190:Thr*<br>166:Glu<br>188:Arg<br>189:Gln<br>167:Leu<br>192:Gln<br>168:Pro                           | 2.9<br>3.3<br>3.3<br>3.4<br>3.8<br>3.9<br>4.0               | 190:Thr*<br>189:Gln<br>188:Arg<br>167:Leu<br>166:Glu<br>165:Met                          | 3.0<br>3.5<br>3.6<br>3.6<br>3.7<br>4.0               | 190:Thr*<br>166:Glu<br>189:Gln<br>188:Arg<br>165:Met<br>167:Leu             | 2.9<br>3.3<br>3.4<br>3.5<br>3.9<br>3.9        |
|                   |               | 526:Val          | 166:Glu*                                                              | 2.8                                           | 166:Glu*<br>165:Met                                                                                  | 3.3<br>3.4                                                  | 166:Glu*<br>165:Met<br>189:Gln                                                           | 3.4<br>3.5<br>3.6                                    | 166:Glu*<br>165:Met                                                         | 3.1<br>3.5                                    |
|                   |               | 527:Leu          | 41:His<br>49:Met<br>165:Met                                           | 3.1<br>3.3<br>3.3                             | 49:Met<br>164:His<br>41:His<br>165:Met                                                               | 3.5<br>3.6<br>3.7<br>4.0                                    | 189:Gln*<br>49:Met<br>41:His<br>164:His                                                  | 3.2<br>3.8<br>3.8<br>3.9                             | 164:His<br>49:Met<br>41:His<br>165:Met                                      | 3.6<br>3.7<br>3.8<br>4.0                      |
|                   |               | 528:Gln          | 63:His*<br>143:Gly*<br>140:Phe*<br>145:Cys*                           | 2.8<br>3.0<br>3.1<br>3.2                      | 143:Gly*<br>163:His*<br>140:Phe*<br>166:Glu*<br>145:Cys*<br>144:Ser<br>141:Leu<br>142:Asn<br>164:His | 2.9<br>3.0<br>3.0<br>3.1<br>3.2<br>3.3<br>3.6<br>3.6<br>3.7 | 143:Gly*<br>140:Phe*<br>163:His*<br>144:Ser<br>145:Cys*<br>166:Glu<br>141:Leu<br>142:Asn | 3.0<br>3.0<br>3.0<br>3.2<br>3.3<br>3.4<br>3.6<br>3.7 | 166:Glu*<br>143:Gly*<br>140:Phe<br>142:Asn<br>144:Ser*<br>145:Cys<br>41:Leu | 3.0<br>3.0<br>3.1<br>3.1<br>3.1<br>3.3<br>3.5 |
|                   |               | 529:Ser          | 142:Asn<br>25:Thr<br>143:Gly<br>145:Cys<br>41:His<br>26:Thr<br>27:Leu | 3.0<br>3.5<br>3.7<br>3.8<br>3.8<br>3.9<br>4.0 | 41:His<br>143:Gly<br>142:Asn<br>27:Leu<br>145:Cys<br>25:Thr<br>26:Thr                                | 3.4<br>3.5<br>3.6<br>3.9<br>3.9<br>4.0<br>4.0               | 41:His<br>143:Gly<br>49:Met<br>42:Asn                                                    | 3.2<br>3.8<br>3.9<br>4.0                             | 41:His<br>143:Gly<br>145:Cys<br>142:Asn<br>26:Thr                           | 3.2<br>3.3<br>3.7<br>3.8<br>3.9               |
|                   |               | 530:Gly          | 26:Thr*                                                               | 2.8                                           | 26:Thr*<br>143:Gly<br>25:Thr                                                                         | 2.9<br>3.3<br>3.6                                           | 26:Thr<br>143:Gly<br>25:Thr                                                              | 2.9<br>3.3<br>3.6                                    | 26:Thr*<br>143:Gly<br>25:Thr                                                | 2.9<br>3.3<br>3.7                             |
|                   |               | 531:Phe          | 24:Thr<br>26:Thr<br>142:Asn                                           | 3.0<br>3.3<br>3.8                             | 24:Thr<br>26:Thr                                                                                     | 3.3<br>4.0                                                  | 46:Ser<br>24:Thr<br>25:Thr                                                               | 3.3<br>3.5<br>3.6                                    | 24:Thr<br>46:Ser<br>49:Met                                                  | 3.3<br>3.3<br>4.0                             |
|                   |               | Peptide-<br>(I)  | Hydrogen<br>Bond                                                      | 525:His                                       | -                                                                                                    | -                                                           | 190:Thr                                                                                  | 2.9                                                  | 188:Arg                                                                     | 3.0                                           |
|                   |               | 526:Tyr          | 166:Glu                                                               | 3.3                                           | -                                                                                                    | -                                                           | 166:Glu                                                                                  | 3.4                                                  |                                                                             |                                               |



|         |                     |                       |                    |                    |                    |                    |                                          |                          |                    |                               |                   |
|---------|---------------------|-----------------------|--------------------|--------------------|--------------------|--------------------|------------------------------------------|--------------------------|--------------------|-------------------------------|-------------------|
|         |                     | 527:His               |                    |                    |                    |                    | 164:His                                  | 3.0                      |                    |                               |                   |
|         |                     | 528:Lys               | 143:Gly<br>145:Cys | 2.9<br>3.4         | 143:Gly<br>145:Cys | 2.9<br>3.3         | 140:Phe<br>143:Gly<br>145:Cys<br>166:Glu | 3.0<br>3.0<br>3.1<br>2.9 | 140:Phe<br>166:Glu | 3.0<br>2.9                    |                   |
|         |                     | 529:His               | -                  | -                  | -                  | -                  | -                                        | -                        | 143:Gly            | 3.1                           |                   |
|         |                     | 530:Tyr               | 26:Thr<br>25:Thr   | 2.8<br>3.6         | 26:Thr<br>25:Thr   |                    | 26:Thr                                   | 2.9                      | -                  | -                             |                   |
|         | <b>Pi-Pi</b>        | 527:His               | 41:His             | 3.0                | 41:His             | 3.1                | -                                        | -                        | -                  | -                             |                   |
|         | <b>Salt bridge</b>  | 528:Lys               | 166:Glu            | 3.1                | -                  | -                  | 166:Glu                                  | 2.9                      | 166:Glu            | 2.9                           |                   |
|         | <b>Peptide-(II)</b> | <b>Hydrogen Bonds</b> | 525:His            | 190:Thr            | 2.9                | 190:Thr            | 2.9                                      | 190:Thr                  | 2.8                | 188:Arg                       | 2.9               |
|         |                     |                       | 526:Tyr            | 166:Glu            | 3.0                | 166:Glu            | 3.4                                      |                          |                    | 166:Glu                       | 3.4               |
|         |                     |                       | 528:Lys            | 143:Gly<br>145:Cys | 2.8<br>3.3         | 143:Gly<br>145:Cys | 2.9<br>3.2                               | 140:Phe<br>166:Glu       | 3.0<br>2.9         | 140:Phe<br>143:Gly<br>145:Cys | 3.0<br>2.9<br>3.3 |
|         |                     |                       | 529:His            |                    |                    |                    |                                          | 143:Gly                  | 3.1                | 46:Ser                        | 3.1               |
| 530:Tyr |                     |                       | 26:Thr<br>25:Thr   | 2.7<br>3.5         | 26:Thr<br>25:Thr   | 2.7<br>3.5         |                                          |                          | 26:Thr             | 3.0                           |                   |

**Table S2.** Tukey or Dunnett multiple comparison testing made in between the average docking scores of substrate peptide(control) and canonical amino acid mutant peptides.

| Type               | P adjacent |           |           |           |
|--------------------|------------|-----------|-----------|-----------|
|                    | Wild type  | Omicron   | Beta      | Lambda    |
| <b>GLN-Control</b> | 0.9989987  | 1         | 0.9976458 | 1         |
| <b>ASP-Control</b> | 1          | 1         | 1         | 1         |
| <b>HIS-Control</b> | 0.9415269  | 0.9999999 | 1         | 0.7247772 |
| <b>ARG-Control</b> | 0.9999976  | 1         | 0.9210504 | 0.9999999 |
| <b>LYS-Control</b> | 1          | 0.9999927 | 0.9999881 | 1         |
| <b>GLU-Control</b> | 0.9985704  | 1         | 0.9900602 | 1         |
| <b>ASN-Control</b> | 0.9999999  | 1         | 0.9998998 | 0.9999998 |
| <b>CYS-Control</b> | 1          | 1         | 1         | 0.9999525 |
| <b>THR-Control</b> | 1          | 1         | 0.9999434 | 1         |
| <b>SER-Control</b> | 1          | 1         | 1         | 1         |
| <b>TRP-Control</b> | 0.4072177  | 0.9980674 | 1         | 0.9989491 |
| <b>TYR-Control</b> | 0.2558095  | 0.9999998 | 0.9999884 | 0.9999882 |
| <b>PHE-Control</b> | 0.1944254  | 0.9999844 | 0.9992989 | 0.9968224 |
| <b>ILE-Control</b> | 1          | 1         | 0.999999  | 1         |
| <b>MET-Control</b> | 0.9999997  | 0.9992334 | 1         | 0.999997  |
| <b>LEU-Control</b> | 1          | 1         | 1         | 0.9999806 |
| <b>VAL-Control</b> | 1          | 1         | 1         | 1         |
| <b>ALA-Control</b> | 1          | 0.9999989 | 1         | 1         |

**Table S3.** Tukey or Dunnett multiple comparison testing made in between the average docking scores of (SARS-CoV2/Wild Type (WT)) and SARS CoV2 variants (Omicron, Beta and Lambda).

|                   | difference | lower      | upper      | p adjacent |
|-------------------|------------|------------|------------|------------|
| <b>Omicron-WT</b> | -16.592434 | -20.145196 | -13.039672 | 0.0000000  |
| <b>Beta-WT</b>    | -8.390461  | -11.943222 | -4.837699  | 0.0000000  |
| <b>Lambda-WT</b>  | 1.164474   | -2.388288  | 4.717236   | 0.8331979  |

**Table S4.** Mpro sequence data collection for SARS-CoV2 variants

| <b>Variant</b>             | <b>Virus name</b>                              | <b>Accession ID</b> | <b>Collecti on date</b> | <b>Submiss ion Date</b> | <b>Lengt h</b> | <b>Location</b>            | <b>Originating lab</b>                                                       |
|----------------------------|------------------------------------------------|---------------------|-------------------------|-------------------------|----------------|----------------------------|------------------------------------------------------------------------------|
| <b>Alpha (B.1.1.7)</b>     | hCoV-19/Japan/HiroY H02/2021                   | EPI_ISL_6756515     | 8/2/21                  | 11/26/21                | 29763          | Asia/Japan/T okyo          | The Virology lab, Hiroshima University                                       |
| <b>Beta (B.1.351)</b>      | hCoV-19/Japan/TY27-328-P0/2021                 | EPI_ISL_5416540     | --/07/21                | 10/21/21                | 29764          | Asia/Japan/T okyo          | Department of Virology I, National Institute of Infectious Diseases          |
| <b>Gamma (P.1)</b>         | hCoV-19/Japan/TY30-974-P0/2021                 | EPI_ISL_6228367     | --/08/21                | 11/12/21                | 29768          | Asia/Japan/T okyo          | Department of Virology I, National Institute of Infectious Diseases          |
| <b>Delta (B.1.617.2)</b>   | hCoV-19/Japan/TKYS 01334/2021                  | EPI_ISL_6832166     | 10/25/21                | 11/29/21                | 29769          | Asia/Japan/T okyo          | Tokyo Metropolitan Institute of Public Health                                |
| <b>Omicron (BA.1)</b>      | hCoV-19/Sweden/OmicronCoV_Isolate_1/2021       | EPI_ISL_10866182    | --/--/21                | 3/9/22                  | 29,822         | Europe/ Sweden             | Swedish national genomic surveillance program of SARS-CoV-2                  |
| <b>Omicron (BA.2)</b>      | hCoV-19/ Cabo Verde/FG-AG0104/2022             | EPI_ISL_14721358    | 7/22/22                 | 8/29/22                 | 29,660         | Africa/ Cabo Verde/ Fogo   | Virology Laboratory of Fogo                                                  |
| <b>Omicron (BA.2.12.1)</b> | hCoV-19/ India/DL-GSL MAMC_L NH/2022           | EPI_ISL_12643348    | 4/30/22                 | 5/11/22                 | 29,862         | Asia/India/D elhi          | Department of Microbiology, MAMC & Genome Sequencing Lab, Lok Nayak Hospital |
| <b>Omicron (BA.4)</b>      | hCoV-19/Andorra/AN D-255 221941418 801-GC/2022 | EPI_ISL_14551163    | 6/29/22                 | 8/19/22                 | 29,636         | Europe / Andorra / Andorra | Laboratori d'anàlisis clíniques, Hospital Nostra Senyora de Meritxell        |
| <b>Omicron (BA.5)</b>      | hCoV-19/Andorra/AN D-259 221941419 101-GC/2022 | EPI_ISL_14551152    | 7/3/22                  | 8/19/22                 | 29,622         | Europe / Andorra / Andorra | Laboratori d'anàlisis clíniques, Hospital Nostra Senyora de Meritxell        |
| <b>Theta (P.3)</b>         | hCoV-19/Angola/CERI -KRISP-K012704/2021        | EPI_ISL_2492682     | 3/18/21                 | 6/11/21                 | 29,811         | Africa / Angola / Luanda   | Instituto Nacional de Investigaçao em Saude                                  |
| <b>Zeta (P.2)</b>          | hCoV-19/Argentina/C9 7133/2020                 | EPI_ISL_778843      | 11/20/20                | 1/7/21                  | 29,896         | South America / Argentina  | Servicio Virosis Respiratorias- Departamento Virologia- INEI                 |
| <b>Epsilon (B.1.427)</b>   | hCoV-19/Anguilla/603                           | EPI_ISL_2478962     | 3/19/21                 | 6/10/21                 | 29,782         | North America /            | The Caribbean Public Health Agency                                           |

| Variant                  | Virus name                                     | Accession ID     | Collecti on date | Submiss ion Date | Lengt h | Location                                                    | Originating lab                                              |
|--------------------------|------------------------------------------------|------------------|------------------|------------------|---------|-------------------------------------------------------------|--------------------------------------------------------------|
|                          | 00/2021                                        |                  |                  |                  |         | Anguilla                                                    |                                                              |
| <b>Eta (B.1.525)</b>     | hCoV-19/Algeria/17885/2021                     | EPI ISL_12156746 | 3/1/21           | 4/20/22          | 29,311  | Africa / Algeria / Algiers                                  | NIC, Viral Respiratory Unit                                  |
| <b>Kappa (B.1.617.1)</b> | hCoV-19/Angola/CERI-KRISP-K012705/2021         | EPI ISL_2493071  | 3/21/21          | 6/11/21          | 29,842  | Africa / Angola / Luanda                                    | Instituto Nacional de Investigaçao em Saude                  |
| <b>Iota (B.1.526)</b>    | hCoV-19/Afghanistan/2870x0198_23487_23597/2021 | EPI ISL_4572806  | 4/7/21           | 9/29/21          | 29,721  | Asia / Afghanistan                                          | Afghanistan                                                  |
| <b>Mu (B.1.621)</b>      | hCoV-19/Argentina/INEI109824/2021              | EPI ISL_7751221  | 7/9/21           | 12/17/21         | 29,902  | South America / Argentina / CABA                            | Servicio Virosis Respiratorias- Departamento Virologia- INEI |
| <b>Lambda (C.37)</b>     | hCoV-19/Argentina/INEI096534/2020              | EPI ISL_2158693  | 11/8/20          | 5/19/21          | 29,792  | South America / Argentina / Ciudad Autonoma de Buenos Aires | Servicio Virosis Respiratorias- Departamento Virologia- INEI |

**Table S5.** Binding free energy of peptide and peptide-analogs against Mpro (SARS-CoV-2 and Omicron)

| Energy             | Mpro(SARS-CoV2)_ Control | Mpro(Omicron)_ Control | Mpro(SARS-CoV2)_ Peptide(I) | Mpro(Omicron)_ Peptide(I) | Mpro(SARS-CoV2)_ Peptide(II) | Mpro(Omicron)_ Peptide(II) |
|--------------------|--------------------------|------------------------|-----------------------------|---------------------------|------------------------------|----------------------------|
| $\Delta E_{vdw}$   | -72.41                   | -76.00                 | -97.51                      | -100.40                   | -93.98                       | -92.06                     |
| $\Delta E_{Eel}$   | -59.77                   | -64.96                 | -224.66                     | -230.73                   | -197.40                      | -251.61                    |
| $\Delta E_{Egb}$   | 94.43                    | 99.14                  | 262.25                      | 268.68                    | 233.13                       | 284.88                     |
| $\Delta E_{Esurf}$ | -9.29                    | -9.92                  | -12.15                      | -12.33                    | -11.62                       | -11.76                     |
| $\Delta G_{Gas}$   | -132.19                  | -140.97                | -322.17                     | -331.14                   | -291.39                      | -343.68                    |
| $\Delta G_{Solv}$  | 85.13                    | 89.21                  | 250.09                      | 256.34                    | 221.50                       | 273.12                     |
| $\Delta G_{Total}$ | <b>-47.05</b>            | <b>-51.75</b>          | <b>-72.0</b>                | <b>-74.79</b>             | <b>-69.88</b>                | <b>-70.56</b>              |
